# Supplementary material for: Cyclometallation of amino-imines on palladium complexes. The effect of the solvent on the experimental and calculated mechanism
Source: Royal Society of Chemistry journal article supplement (doi:10.1039/b905134a), 2009-01-01
Supplement: b905134a.pdf [file b905134a.pdf]

# **CYCLOMETALLATION OF AMINO-IMINES ON PALLADIUM COMPLEXES. THE EFFECT OF THE SOLVENT ON THE EXPERIMENTAL AND CALCULATED MECHANISM.**

*Gabriel Aullón,<sup>a</sup> Romain Chat,<sup>a</sup> Isabelle Favier,<sup>a</sup> Mercè Font-Bardia,<sup>b</sup> Montserrat Gómez,<sup>a</sup> Jaume Granell,<sup>a</sup> Manuel Martínez<sup>a</sup> and Xavier Solans.<sup>b</sup>*

<sup>a</sup> Departament de Química Inorgànica, Universitat de Barcelona, Martí i Franquès, 1-11, E-08028 Barcelona, SPAIN.

<sup>b</sup> Departament de Cristal·lografia, Mineralogia i Dipòsits Minerals, Universitat de Barcelona, Martí i Franquès s/n, E-08028 Barcelona, SPAIN

---

***Supplementary material***

**Figure S1.**– UV–Vis spectral changes of the  $Z \rightleftharpoons E$  isomerization reaction of complex  $Z\text{-}2\text{AcO}$ , in methanol solution at 25 °C and  $[\text{Pd}] \approx 5 \times 10^{-5} \text{ M}$ .

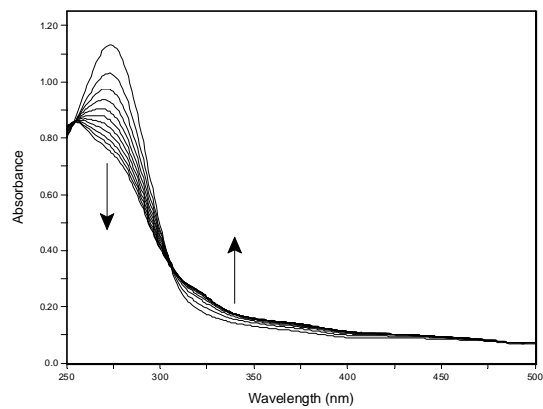

**Figure S2.**– Energy profile (data from Table 2) for the proposed mechanism from  $[\text{Pd}(\eta^2\text{-AcO})(\text{HAcO})(\kappa^1\text{-N}_{\text{imino}})]^+$  (**B1**) having an external acetic molecule assisting the transition state in methanol.

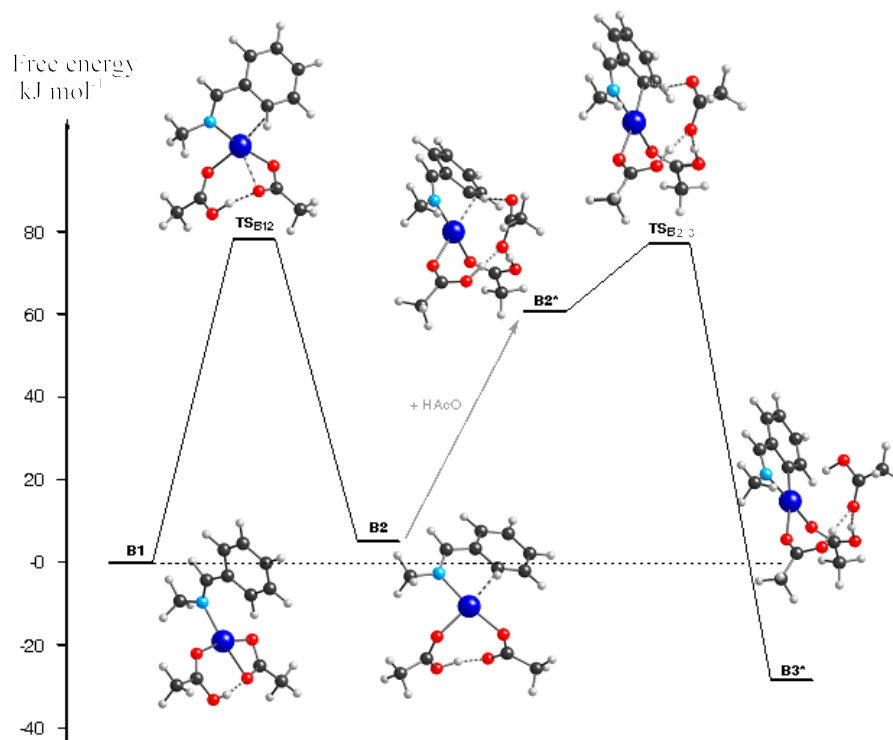

The individual values of the relative energies for this assisted mechanism have been estimated by comparison with those having an acetic acid molecule obtained from a half dimer,  $\text{H}_2(\text{AcO})_2$ , and are probably overstabilized by two intermolecular hydrogen bonds.

**Table S1.**– Numbering scheme and  $^1\text{H}$  NMR ( $\text{CD}_3\text{OD}$  solution, 400 MHz, 298 K) data ( $\delta$  (J) /ppm(Hz), reference TMS) for all the complexes studied; n.e. stands for non-existent nucleus in the compound.

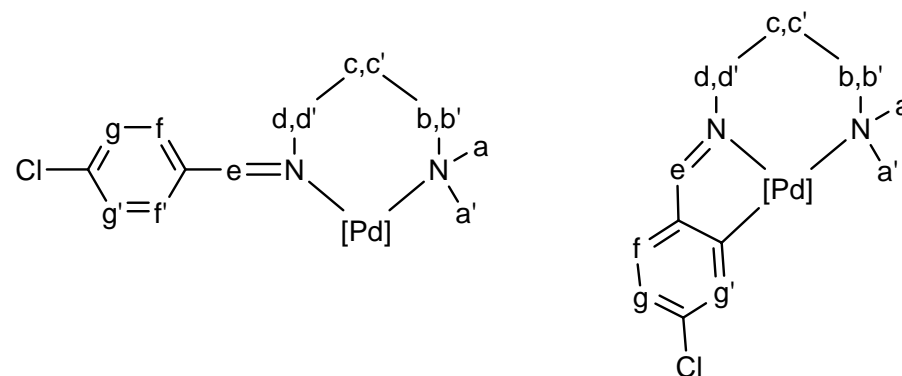

| Compound        | a; a'      | b; b'              | c; c'    | d; d'               | e             | f; f'               | g; g'                              |
|-----------------|------------|--------------------|----------|---------------------|---------------|---------------------|------------------------------------|
| <i>E</i> -1AcO  | 2.64       | 2.52 (m)           | n.e.     | 4.04 (m)            | 8.22 (b)      | 8.21 (d, 8.4)       | 7.42 (d,8.4)                       |
| <i>Z</i> -1AcO  | 2.59       | 2.61 (m)           | n.e.     | 3.89 (td, 6.0, 2.0) | 7.81 (b)      | 7.54 (d, 8.8)       | 7.49 (d, 8.8)                      |
| <i>E</i> -1Cl   | 2.61; 2.49 | 1.94 (m); 2.38 (m) | n.e.     | 3.3 (m); 4.55 (m)   | 8.22 (b)      | 9.15 (d, 8.4)       | 7.58 (d, 8.4)                      |
| <i>E</i> -2AcO  | 2.22; 2.41 | 3.50–3.56–4.70 (m) |          |                     | 8.07 (b)      | 9.42 (d, 8.4)       | 7.62 (d, 8.4)                      |
| <i>E</i> -2Cl   | 2.53; 2.71 | 3.82 (m)           | 2.05 (m) | 4.65 (m)            | 8.32          | 9.21 (d, 8.8)       | 7.67 (d, 8.8)                      |
| <i>CM</i> -1AcO | 2.54       | 2.85 (t, 6.1)      | n.e.     | 3.82 (td, 6.1, 2.6) | 8.00 (t, 8.0) | 7.15 (d, 8.2); n.e. | 6.94 (dd, 8.2, 2.2); 6.75 (d, 2.2) |
| <i>CM</i> -1Cl  | 2.52       | 2.55 (t, 5.2)      | n.e.     | 3.62 (td, 5.4, 1.6) | 8.13 (b)      | 7.15 (d 8.0);n.e.   | 6.93(dd, 8.0, 2.0); 7.64 (d, 2.0)  |
| <i>CM</i> -2AcO | 2.4        | 2.55 (m)           | 2.03 (b) | 3.55 (m)            | 8.05          | 7.17 (d, 8.0); n.e. | 6.94 (dd, 8.0, 2.0); 6.74 (d, 2.0) |
| <i>CM</i> -2Cl  | 2.62       | 2.64 (m)           | 1.94 (m) | 3.71 (m)            | 8.22 (t, 1.8) | 7.25 (d, 8.0); n.e. | 7.02 (dd, 8.0, 2.0); 7.74 (d, 2.0) |

m = multiplet; d = doublet; t = triplet; dd = doublet of doublets; b = broad

**Table S2.** – Calculated relative energies (in kJ/mol) for the stationary points in the cyclopalladation process in gas phase, toluene, methanol and water solutions (**A1 = B1** and **A3 = B4**).

|                                                     | <b>Gas phase</b> | <b>Toluene</b> | <b>Methanol</b> | <b>Water</b> |
|-----------------------------------------------------|------------------|----------------|-----------------|--------------|
| <b><i>6-membered transition state mechanism</i></b> |                  |                |                 |              |
| <b>A1</b>                                           | 0.0              | 0.0            | 0.0             | 0.0          |
| <b>TS<sub>A1-2</sub></b>                            | 45.0             | 43.1           | 40.1            | 38.6         |
| <b>A2</b>                                           | 31.2             | 20.5           | 8.6             | 6.7          |
| <b>TS<sub>A2-3</sub></b>                            | 57.4             | 50.4           | 46.2            | 46.6         |
| <b>A3</b>                                           | -31.9            | -36.9          | -39.2           | -39.1        |
| <b><i>4-membered transition state mechanism</i></b> |                  |                |                 |              |
| <b>B1 = A1</b>                                      | 0.0              | 0.0            | 0.0             | 0.0          |
| <b>TS<sub>B1-2</sub></b>                            | 67.8             | 58.1           | 72.3            | 72.0         |
| <b>B2</b>                                           | 32.2             | 20.2           | 9.7             | 8.3          |
| <b>B2*</b>                                          | 43.4             | 39.3           | 35.1            | 8.3          |
| <b>TS<sub>B2-3</sub></b>                            | 160.2            | 154.3          | 146.2           | 145.7        |
| <b>TS<sub>B2-3</sub>*</b>                           | 49.0             | 47.6           | 49.5            | 50.6         |
| <b>B3</b>                                           | 14.4             | 4.3            | -4.2            | -5.8         |
| <b>B3*</b>                                          | -44.8            | 40.2           | -31.7           | -15.2        |
| <b>B4 = A3</b>                                      | -31.9            | -36.9          | -39.2           | -39.1        |
| <b><i>Acid-assisted mechanism</i></b>               |                  |                |                 |              |
| <b>C1</b>                                           | 0.0              | 0.0            | 0.0             | 0.0          |
| <b>TS<sub>C1-2</sub></b>                            | 38.1             | 38.0           | 31.0            | 26.7         |
| <b>C2</b>                                           | 20.4             | 19.0           | 14.0            | 15.0         |
| <b>TS<sub>C2-3</sub></b>                            | 41.2             | 41.2           | 40.7            | 43.5         |
| <b>C3</b>                                           | -155.4           | -74.5          | -18.9           | -6.7         |

**Table S3.**– Absolute energies, and free energies for calculated stationary points. Data are in atomic units (Hartrees) (**A1 = B1** and **A3 = B4**).

|                                                      | $E_{\text{ELECTRONIC}}$ | $\Delta G^{\circ}$ |
|------------------------------------------------------|-------------------------|--------------------|
| <i>6-membered cycle</i>                              |                         |                    |
| <b>A1</b>                                            | -949.7575134            | -949.544722        |
| <b>TS<sub>A12</sub></b>                              | -949.7403813            | -949.522199        |
| <b>A2</b>                                            | -949.7456401            | -949.530644        |
| <b>TS<sub>A23</sub></b>                              | -949.7356411            | -949.522476        |
| <b>A3</b>                                            | -949.7696494            | -949.553018        |
| <i>4-membered cycle (including assisted pathway)</i> |                         |                    |
| <b>B1</b>                                            | -949.7575134            | -949.516309        |
| <b>TS<sub>B12</sub></b>                              | -949.7316896            | -949.532067        |
| <b>B2</b>                                            | -949.7452629            | -949.485946        |
| <b>TS<sub>B23</sub></b>                              | -949.6964862            | -949.536522        |
| <b>B3</b>                                            | -949.7520097            | -949.529584        |
| <b>B4</b>                                            | -949.7696494            | -949.553018        |
| <b>B1+HAcO</b>                                       | -1178.6920952           | -1178.434926       |
| <b>B2*</b>                                           | -1178.6755488           | -1178.408799       |
| <b>TS<sub>B23</sub>*</b>                             | -1178.6734296           | -1178.405647       |
| <b>B3*</b>                                           | -1178.7091604           | -1178.440987       |
| <i>Acid-catalyzed mechanism</i>                      |                         |                    |
| <b>C1</b>                                            | -1178.9442668           | -1178.663295       |
| <b>TS<sub>C12</sub></b>                              | -1178.9297607           | -1178.654821       |
| <b>C2</b>                                            | -1178.9364890           | -1178.661302       |
| <b>TS<sub>C23</sub></b>                              | -1178.9285663           | -1178.653466       |
| <b>C3</b>                                            | -1179.0034479           | -1178.736704       |
| Only Complex                                         | -949.7695653            | -949.551170        |
| <i>Acetic derivatives</i>                            |                         |                    |
| <b>H<sub>2</sub>(AcO)<sub>2</sub></b>                | -457.8691636            | -457.780408        |
| <b>AcO<sup>-</sup></b>                               | -228.3323232            | -228.310590        |
| <b>H<sub>2</sub>AcO<sup>+</sup></b>                  | -229.2338826            | -229.185534        |

**Table S4.** – Values of  $k_{\text{obs}}$  for the systems studied in methanol solution, as a function of the starting coordination compound, temperature and pressure;  $[\text{Pd}] = (5-10) \times 10^{-4}$  M. All the values are the average of 2 to 4 runs.

| Palladium complex                | T /°C | P /atm | $10^4 \times k_{\text{obs}} / \text{s}^{-1}$ |
|----------------------------------|-------|--------|----------------------------------------------|
| <i>E</i> - <b>1AcO</b> fast step | 20    | 1      | 2                                            |
|                                  | 25    | 1      | 3.8                                          |
|                                  | 31.7  | 1      | 8                                            |
|                                  | 35    | 1      | 13                                           |
|                                  | 40.7  | 1      | 24                                           |
|                                  | 45    | 1      | 35                                           |
|                                  | 48.6  | 1      | 48                                           |
| <i>E</i> - <b>1AcO</b> slow step | 20    | 1      | 0.08                                         |
|                                  | 25    | 1      | 0.017                                        |
|                                  | 31.7  | 1      | 0.5                                          |
|                                  | 35    | 1      | 0.9                                          |
|                                  | 40.7  | 1      | 1.8                                          |
|                                  | 45    | 1      | 4.1                                          |
|                                  | 46.5  | 300    | 5.2                                          |
|                                  |       | 600    | 5.5                                          |
|                                  |       | 900    | 6.5                                          |
|                                  |       | 1200   | 6.8                                          |
|                                  | 1500  | 7.3    |                                              |
|                                  | 48.6  | 1      | 7.8                                          |
| <i>Z</i> - <b>1AcO</b> fast step | 54.4  | 1      | 16                                           |
|                                  | 23    | 300    | 3.5                                          |
|                                  |       | 600    | 5                                            |
|                                  |       | 900    | 4.5                                          |
|                                  |       | 1200   | 4                                            |
|                                  |       | 1500   | 3.3                                          |
|                                  | 25    | 1      | 1.6                                          |
|                                  | 26.9  | 1      | 2                                            |
|                                  | 39.4  | 1      | 8                                            |
|                                  | 48    | 1      | 16                                           |
| 54                               | 1     | 38     |                                              |
| <i>Z</i> - <b>1AcO</b> slow step | 25    | 1      | 0.19                                         |
|                                  | 26.9  | 1      | 0.26                                         |

|                      |      |      |      |
|----------------------|------|------|------|
|                      | 39.4 | 1    | 1.8  |
|                      | 43   | 300  | 3.2  |
|                      | 43   | 600  | 3.4  |
|                      | 43   | 900  | 3.6  |
|                      | 43   | 1500 | 4.3  |
|                      | 48   | 1    | 6.9  |
|                      | 54   | 1    | 13   |
| <b><i>E-1Cl</i></b>  | 13   | 600  | 2.4  |
|                      |      | 900  | 2.9  |
|                      |      | 1200 | 3    |
|                      |      | 1500 | 3.8  |
|                      | 13.1 | 1    | 2.1  |
|                      | 19   | 300  | 5.2  |
|                      |      | 600  | 5.3  |
|                      |      | 900  | 7    |
|                      |      | 1200 | 7    |
|                      |      | 1500 | 8    |
|                      | 21.5 | 1    | 6.8  |
|                      | 25   | 1    | 13   |
|                      | 29.6 | 1    | 19   |
|                      | 40   | 1    | 48   |
|                      | 44.6 | 1    | 61   |
| <b><i>E-2AcO</i></b> | 14.4 | 1    | 0.39 |
|                      | 22.2 | 1    | 1.3  |
|                      | 29.3 | 1    | 3.6  |
|                      | 30   | 300  | 4.1  |
|                      |      | 600  | 4.4  |
|                      |      | 900  | 5.2  |
|                      |      | 1200 | 5.3  |
|                      |      | 1500 | 6.1  |
|                      | 34.5 | 1    | 11   |
|                      | 39.4 | 1    | 29   |
|                      | 45   | 1    | 62   |
| <b><i>E-2Cl</i></b>  | 17   | 300  | 5.1  |
|                      |      | 600  | 5.6  |
|                      |      | 900  | 6.5  |
|                      |      | 1200 | 7.4  |



|      |      |     |
|------|------|-----|
|      | 1500 | 7.6 |
| 18.1 | 1    | 4.6 |
| 25   | 1    | 11  |
| 31.8 | 1    | 18  |
| 37.4 | 1    | 37  |
| 44.9 | 1    | 60  |

<sup>fast step</sup> Corresponds to the establishment of the  $Z \rightleftharpoons E$  equilibrium

<sup>slow step</sup> Correspond to formation of the **1AcO**-*CM*
